# Supplementary material for: Estimates of visual impairment and its causes from the National Eye Survey in Malaysia (NESII)
Source: PubMed Central journal article supplement (PMC6019397; doi:10.1371/journal.pone.0198799), 2018-06-26
Supplement: pone.0198799.s001.pdf [file pone.0198799.s001.pdf]

# RAPID ASSESSMENT FOR AVOIDABLE BLINDNESS

## A. GENERAL INFORMATION

Survey area: NORTHERN

Name: \_\_\_\_\_

Cluster:

Sex: Male:  (1)

Female:  (2)

Year - month: 2 0 1 4 -

Individual no.:

Age (years):

### Examination status:

Examined:  (1) (go to B)

Refused:  (3) (go to E)

Not available:  (2) (go to E)

Not able to communicate:  (4) (go to E)

Always ask: "Did you ever have any problems with your eyes?"

Yes:  (1) No:  (2)

If not available - details (availability / tel number / address)

## B. VISION

Uses distance glasses: No:  (1) Yes:  (2)

Uses reading glasses: No:  (1) Yes:  (2)

### Presenting vision

Right eye

Left eye

Can see 6/12  (1)  (1)

Cannot see 6/12

but can see 6/18  (2)  (2)

Cannot see 6/18

but can see 6/60  (3)  (3)

Cannot see 6/60

but can see 3/60  (4)  (4)

Cannot see 3/60

but can see 1/60  (5)  (5)

Light perception (PL+)  (6)  (6)

No light perception (PL-)  (7)  (7)

### Pinhole vision

Right eye

Left eye

Can see 6/12  (1)  (1)

Cannot see 6/12

but can see 6/18  (2)  (2)

Cannot see 6/18

but can see 6/60  (3)  (3)

Cannot see 6/60

but can see 3/60  (4)  (4)

Cannot see 3/60

but can see 1/60  (5)  (5)

Light perception (PL+)  (6)  (6)

No light perception (PL-)  (7)  (7)

## E. HISTORY, IF NOT EXAMINED

(From relative or neighbour)

### Believed

Right eye

Left eye

Not blind  (1)  (1)

Blind due to cataract  (2)  (2)

Blind due to other causes  (3)  (3)

Operated for cataract  (4)  (4)

## F. WHY CATARACT SURGERY WAS NOT DONE

(Mark up to 2 responses, if VA<6/18, not improving with pinhole, with visually impairing lens opacity in one or both eyes)

Need not felt  (1)

Fear of surgery or poor result  (2)

Cannot afford operation  (3)

Treatment denied by provider  (4)

Unaware that treatment is possible  (5)

No access to treatment  (6)

Local reason (optional)  (7)

## C. LENS EXAMINATION

Right eye

Left eye

Normal lens / minimal lens opacity:  (1)  (1)

Obvious lens opacity:  (2)  (2)

Lens absent (aphakia):  (3)  (3)

Pseudophakia without PCO:  (4)  (4)

Pseudophakia with PCO:  (5)  (5)

No view of lens:  (6)  (6)

## D. MAIN CAUSE OF PRESENTING VA<6/12

(Mark only one cause for each eye)

Right eye

Left eye

Principal cause in person

Refractive error:  (1)  (1)  (1)

Aphakia, uncorrected:  (2)  (2)  (2)

Cataract, untreated:  (3)  (3)  (3)

Cataract surg. complications:  (4)  (4)  (4)

Pterygium:  (5)  (5)  (5)

Corneal opacity:  (6)  (6)  (6)

Phthisis:  (7)  (7)  (7)

Myopic Degeneration:  (8)  (8)  (8)

Glaucoma:  (9)  (9)  (9)

Diabetic retinopathy:  (10)  (10)  (10)

ARMD:  (11)  (11)  (11)

Other posterior segment:  (12)  (12)  (12)

All globe/CNS abnormalities:  (13)  (13)  (13)

Not examined: can see 6/12  (14)  (14)  (14)

## G. DETAILS ABOUT CATARACT OPERATION

Right eye

Left eye

Age at operation (years)

Place of operation

Government hospital  (1)  (1)

Voluntary / charitable hospital  (2)  (2)

Private hospital  (3)  (3)

Eye camp / improvised setting  (4)  (4)

Traditional setting  (5)  (5)

Type of surgery

Non IOL  (1)  (1)

IOL implant  (2)  (2)

Couching  (3)  (3)

Cost of surgery

Totally free  (1)  (1)

Partially free  (2)  (2)

Fully paid  (3)  (3)

Cause of VA<6/12 after cataract surgery

Ocular comorbidity (Selection)  (1)  (1)

Operative complications (Surgery)  (2)  (2)

Refractive error (Spectacles)  (3)  (3)

Longterm complications (Sequelae)  (4)  (4)

Does not apply - can see 6/12  (5)  (5)
